# Supplementary material for: Analysis of diverse eukaryotes suggests the existence of an ancestral mitochondrial apparatus derived from the bacterial type II secretion system
Source: PubMed Central journal article supplement (PMC8134430; doi:10.1038/s41467-021-23046-7), 2021-05-19
Supplement: 41467_2021_23046_MOESM2_ESM.pdf [file 41467_2021_23046_MOESM2_ESM.pdf]

## **Description of Additional Supplementary Files**

**Supplementary Data 1.** Gsp and Gcp protein sequences from the eukaryotic species specifically targeted in the study and their features.

**Supplementary Data 2.** Mitochondrial and peroxisomal proteome of *N. gruberi*.

**Supplementary Data 3.** Gsp and Gcp sequences from non-target organisms.

**Supplementary Data 4.** Sequence data sources.

**Supplementary Data 5.** Species and their predicted proteomes used for the initial step of the search for Gsp-co-occurring genes in eukaryotes.

**Supplementary Data 6.** PCR primers used in the study.
